# Supplementary material for: Re-Evaluation of the Taxonomy of Talaromyces minioluteus
Source: MDPI journal article supplement (doi:10.3390/jof7110993), 2021-11-20

**Suppl. Table S1.** Re-identification of *T. minioluteus* sequences present in GenBank.

| GenBank no. | Old name              | Current name                | Strain / Isolate | Location/substrate                                                                                         |
|-------------|-----------------------|-----------------------------|------------------|------------------------------------------------------------------------------------------------------------|
| FJ004304    | <i>T. minioluteus</i> | <i>T. minioluteus</i>       | ATHUM 5049       | Greece, Athens; air, dairy industry                                                                        |
| KF471124    | <i>T. minioluteus</i> | <i>T. calidominioluteus</i> | PILE_14-5        | Thailand; marine isolate                                                                                   |
| KP764911    | <i>T. minioluteus</i> | <i>Talaromyces</i> sp.      | PmKSA13-01       | Saudi Arabia; air, Al-Masjid an-Nabawi Mosque                                                              |
| KR909188    | <i>T. minioluteus</i> | <i>T. gaditanus</i>         | PEN3             | USA; grapevine wood                                                                                        |
| KY379613    | <i>T. minioluteus</i> | <i>Talaromyces</i> sp.      | SNT2-23          | China; endophytic, in parasitic plant <i>Cynomorium songaricum</i> and its host <i>Nitraria tangutorum</i> |
| LC195241    | <i>T. minioluteus</i> | <i>T. gaditanus</i>         | T4906-7-3        | Japan; painting, stone chamber of the Takamatsuzuka Tumulus                                                |
| LC195244    | <i>T. minioluteus</i> | <i>T. gaditanus</i>         | T7521-8F-1       | Japan; plastic cover, stone chamber of the Takamatsuzuka Tumulus                                           |
| LC195245    | <i>T. minioluteus</i> | <i>T. gaditanus</i>         | T7521-8H-1       | Japan; plastic cover, stone chamber of the Takamatsuzuka Tumulus                                           |
| LC195246    | <i>T. minioluteus</i> | <i>T. gaditanus</i>         | T7530-16-2       | Japan; plaster pieces, stone chamber of the Takamatsuzuka Tumulus                                          |
| LC195247    | <i>T. minioluteus</i> | <i>T. minioluteus</i>       | T7615-5-2        | Japan; wall, stone chamber of the Takamatsuzuka Tumulus                                                    |
| LC195249    | <i>T. minioluteus</i> | <i>T. minioluteus</i>       | K8626-8          | Japan; soil in burial mound of the Kitora Tumulus                                                          |
| LC195250    | <i>T. minioluteus</i> | <i>T. minioluteus</i>       | K101008-7-6      | Japan; clay soil, Kitora Tumulus                                                                           |
| MK841457    | <i>T. minioluteus</i> | <i>Talaromyces</i> sp.      | voucher_NWUSeq45 | South Africa; groundnut                                                                                    |
| MN311448    | <i>T. minioluteus</i> | <i>T. calidominioluteus</i> | DnjP/2           | Serbia; fruit, <i>Cydonia oblonga</i>                                                                      |
| MN311450    | <i>T. minioluteus</i> | <i>T. calidominioluteus</i> | ParP/2           | Serbia; fruit, <i>Solanum lycopersicum</i>                                                                 |
| MN311451    | <i>T. minioluteus</i> | <i>T. calidominioluteus</i> | PP/14            | Serbia; fruit, <i>Citrus sinensis</i>                                                                      |
| MT074701    | <i>T. minioluteus</i> | <i>T. gaditanus</i>         | 3107             | Malaysia; soil                                                                                             |
| MT079313    | <i>T. minioluteus</i> | <i>Talaromyces</i> sp.      | NWU45            | South Africa; peanuts                                                                                      |
| MT441589    | <i>T. minioluteus</i> | <i>T. minnesotensis</i>     | 2nce             | Chile; root tissues, <i>Aristolochia chilensis</i>                                                         |
| MT738204    | <i>T. minioluteus</i> | <i>T. minnesotensis</i>     | CT1-013A         | Canada; plant material                                                                                     |
| MT872096    | <i>T. minioluteus</i> | <i>T. calidominioluteus</i> | KrP/7            | Serbia; fruit, <i>Pyrus communis</i> (common pear)                                                         |
| MT940692    | <i>T. minioluteus</i> | <i>T. calidominioluteus</i> | PUMCH_Q032       | China; tracheal aspirates, <i>Homo sapiens</i>                                                             |
| MW405459    | <i>T. minioluteus</i> | <i>Talaromyces</i> sp.      | 6FP9             | Iran; periphytic biofilm and rhizosphere of rice                                                           |
| MW540483    | <i>T. minioluteus</i> | <i>T. gaditanus</i>         | 4.25             | Croatia; <i>Quercus robur</i> acorn                                                                        |
| MW793373    | <i>T. minioluteus</i> | <i>Talaromyces</i> sp.      | UASWS2526_PD1-12 | Algeria; endophytic, <i>Pancratium maritimum</i> on sand dune                                              |
| MW826207    | <i>T. minioluteus</i> | <i>T. samsonii</i>          | 240315GAR3C2     | Spain; air, La Garma Cave                                                                                  |

Suppl. Figure S1: ITS

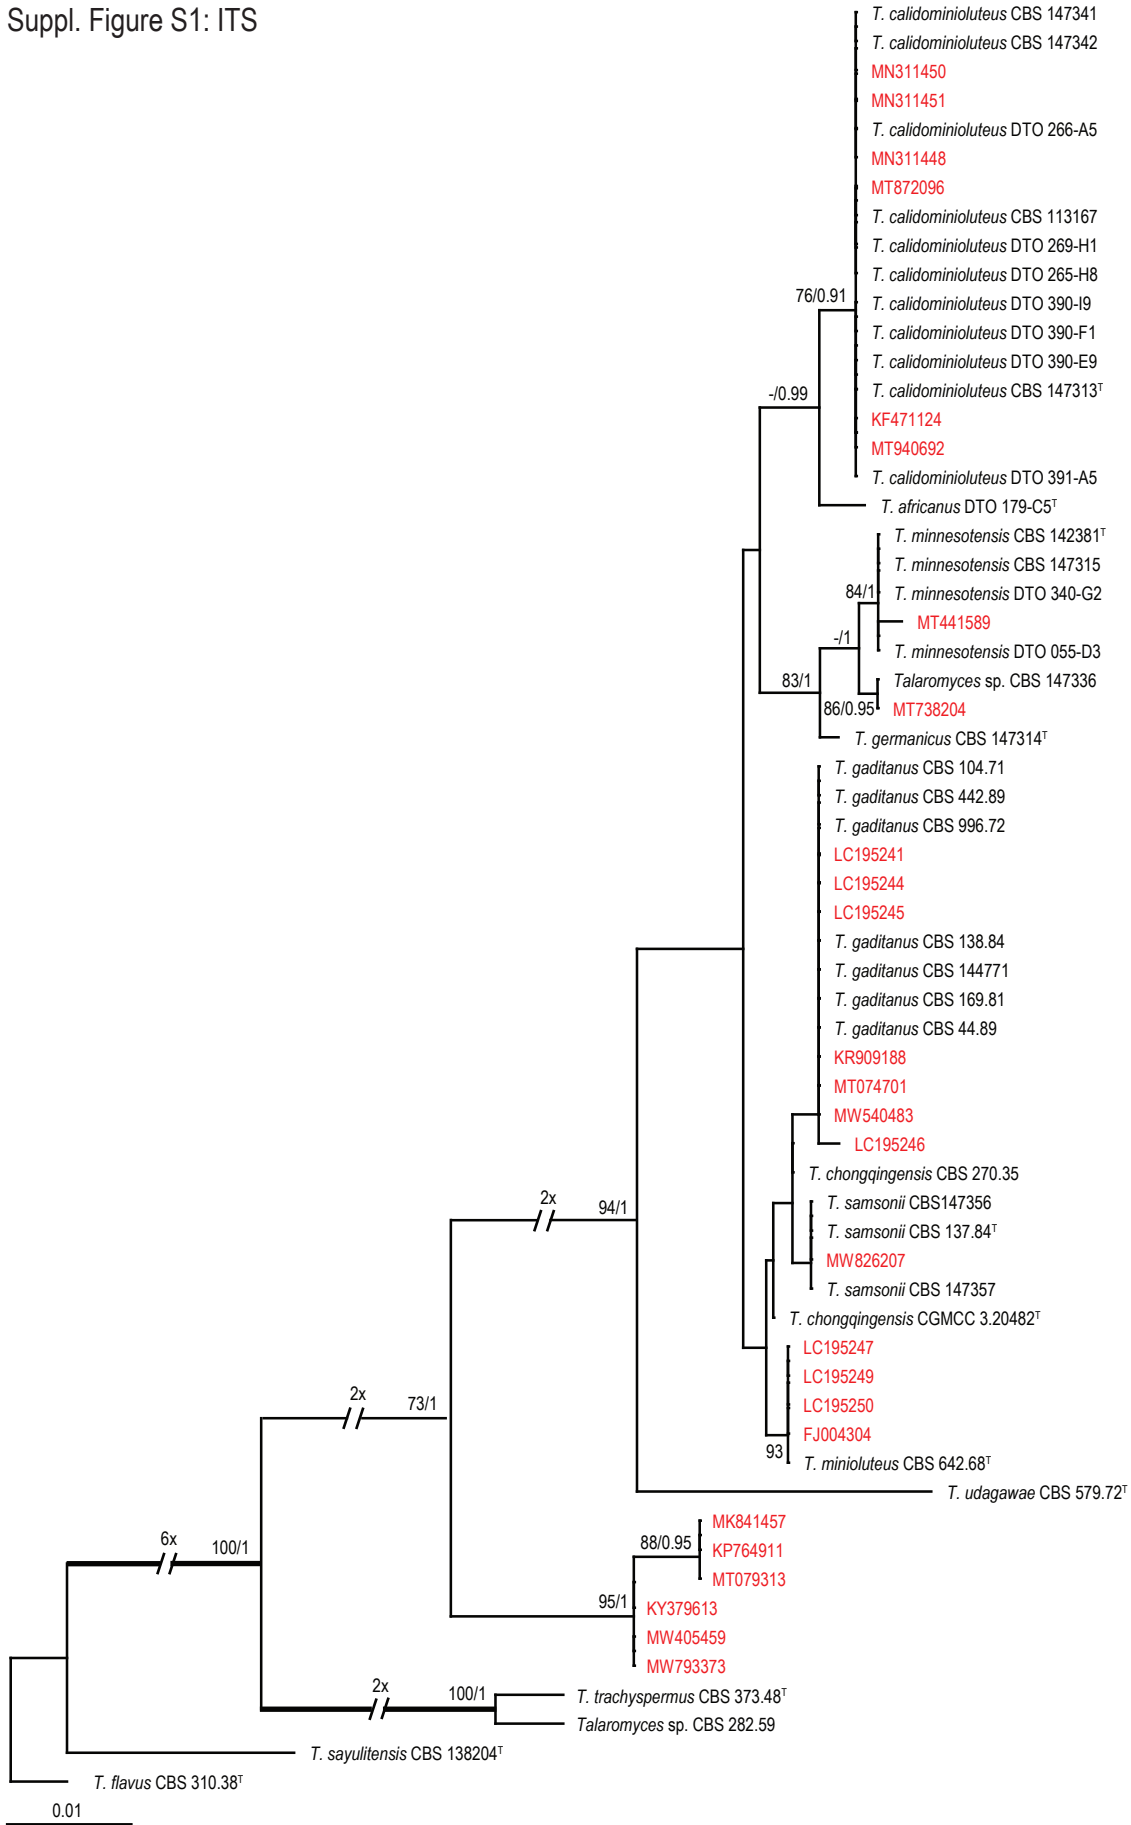

Supplement: s1 [file s1]
